# Supplementary material
Source: PubMed Central journal article supplement (PMC9130341)
Supplement: NIHMS1785584-supplement-1.pdf [file NIHMS1785584-supplement-1.pdf]

**Supplemental Table 1.** Linear regression model examining the association between goal reengagement and Pittsburgh Fatigability Scale Mental scores: MrOS (N=1,670)

|                                             | <b>Model 1</b><br>β Coefficient<br>(SE) | <b>Model 2</b><br>β Coefficient<br>(SE) | <b>Model 3</b><br>β Coefficient<br>(SE) | <b>Model 4</b><br>β Coefficient<br>(SE) |
|---------------------------------------------|-----------------------------------------|-----------------------------------------|-----------------------------------------|-----------------------------------------|
| <b>Personality Measure</b>                  |                                         |                                         |                                         |                                         |
| Goal Reengagement                           | -0.23 (0.20)                            | -0.21 (0.20)                            | 0.22 (0.19)                             | 0.22 (0.20)                             |
| <b>Demographics</b>                         |                                         |                                         |                                         |                                         |
| Age                                         | 0.30 (0.05)*                            | 0.30 (0.05)*                            | 0.18 (0.05)*                            | 0.19 (0.05)*                            |
| Race (ref=White)                            |                                         | -0.33 (1.25)                            |                                         |                                         |
| Black                                       |                                         | -0.50 (1.15)                            |                                         |                                         |
| Asian                                       |                                         | 1.76 (1.36)                             |                                         |                                         |
| Hispanic                                    |                                         | 1.70 (1.73)                             |                                         |                                         |
| Other                                       |                                         |                                         |                                         |                                         |
| Education (ref= ≤high school)               |                                         |                                         |                                         |                                         |
| Some/all college                            |                                         | 0.27 (0.58)                             |                                         |                                         |
| Some/all graduate school                    |                                         | -0.20 (0.57)                            |                                         |                                         |
| <b>Psychological and Behavioral Factors</b> |                                         |                                         |                                         |                                         |
| Cognitive Function <sup>a</sup>             |                                         |                                         | -0.08 (0.03)*                           | -0.08 (0.03)*                           |
| Good/Excellent Health Status                |                                         |                                         | -2.41 (0.66)*                           | -2.23 (0.67)*                           |
| Depressive Symptoms <sup>b</sup>            |                                         |                                         | 5.56 (0.84)*                            | 5.63 (0.85)*                            |
| Sleep Disturbance <sup>c</sup>              |                                         |                                         | 2.20 (0.39)*                            | 2.18 (0.39)*                            |
| Physical Activity <sup>d</sup>              |                                         |                                         | -0.02 (0.00)*                           | -0.02 (0.00)*                           |
| <b>Health-related Conditions</b>            |                                         |                                         |                                         |                                         |
| Hypertension                                |                                         |                                         |                                         | 0.10 (0.39)                             |
| Heart Failure                               |                                         |                                         |                                         | 0.45 (0.71)                             |
| Stroke                                      |                                         |                                         |                                         | 0.59 (0.89)                             |
| Heart Attack                                |                                         |                                         |                                         | -0.44 (0.58)                            |
| Diabetes                                    |                                         |                                         |                                         | 0.88 (0.54)                             |
| Body Mass Index, kg/m <sup>2</sup>          |                                         |                                         |                                         | 0.03 (0.05)                             |

Note. SE=Standard Error

<sup>a</sup> Cognitive function was measured with Teng Mini Mental Scale (0-100); higher score = better cognitive functioning

<sup>b</sup> Significant depressive symptoms are indicated with a score ≥ 6 on the Geriatric Depression Scale

<sup>c</sup> Sleep disturbance is indicated with a score >5 on the Pittsburgh Sleep Quality Index (PSQI)

<sup>d</sup> Physical activity was measured with Physical Activity Scale for the Elderly (PASE) score; higher score = more physically active

\*p≤.05

**Supplemental Table 2.** Linear regression model examining the association between goal disengagement and Pittsburgh Fatigability Scale Mental scores: MrOS (N=1670)

|                                             | <b>Model 1</b><br>β Coefficient<br>(SE) | <b>Model 2</b><br>β Coefficient<br>(SE) | <b>Model 3</b><br>β Coefficient<br>(SE) | <b>Model 4</b><br>β Coefficient<br>(SE) |
|---------------------------------------------|-----------------------------------------|-----------------------------------------|-----------------------------------------|-----------------------------------------|
| <b>Personality Measure</b>                  |                                         |                                         |                                         |                                         |
| Goal Disengagement                          | 0.10 (0.20)                             | 0.09 (0.20)                             | -0.02 (0.19)                            | -0.01 (0.19)                            |
| <b>Demographics</b>                         |                                         |                                         |                                         |                                         |
| Age                                         | 0.30 (0.05)*                            | 0.31 (0.05)*                            | 0.17 (0.05)*                            | 0.19 (0.05)*                            |
| Race (ref=White)                            |                                         | 0.35 (1.26)                             |                                         |                                         |
| Black                                       |                                         | -0.49 (1.15)                            |                                         |                                         |
| Asian                                       |                                         | 1.73 (1.36)                             |                                         |                                         |
| Hispanic                                    |                                         | 1.80 (1.72)                             |                                         |                                         |
| Other                                       |                                         |                                         |                                         |                                         |
| Education (ref= ≤high school)               |                                         |                                         |                                         |                                         |
| Some/all college                            |                                         | 0.24 (0.58)                             |                                         |                                         |
| Some/all graduate school                    |                                         | -0.09 (0.57)                            |                                         |                                         |
| <b>Psychological and Behavioral Factors</b> |                                         |                                         |                                         |                                         |
| Cognitive Function <sup>a</sup>             |                                         |                                         | -0.08 (0.03)*                           | -0.08 (0.03)*                           |
| Good/Excellent Health Status                |                                         |                                         | -2.38 (0.66)*                           | -2.21 (0.67)*                           |
| Depressive Symptoms <sup>b</sup>            |                                         |                                         | 5.47 (0.84)*                            | 5.55 (0.84)*                            |
| Sleep Disturbance <sup>c</sup>              |                                         |                                         | 2.19 (0.39)*                            | 2.15 (0.39)*                            |
| Physical Activity <sup>d</sup>              |                                         |                                         | -0.02 (0.00)*                           | -0.02 (0.00)*                           |
| <b>Health-related Conditions</b>            |                                         |                                         |                                         |                                         |
| Hypertension                                |                                         |                                         |                                         | 0.10 (0.39)                             |
| Heart Failure                               |                                         |                                         |                                         | 0.51 (0.70)                             |
| Stroke                                      |                                         |                                         |                                         | 0.58 (0.89)                             |
| Heart Attack                                |                                         |                                         |                                         | -0.45 (0.58)                            |
| Diabetes                                    |                                         |                                         |                                         | 0.84 (0.54)                             |
| Body Mass Index, kg/m <sup>2</sup>          |                                         |                                         |                                         | 0.04 (0.05)                             |

Note. SE=Standard Error

<sup>a</sup> Cognitive function was measured with Teng Mini Mental Scale (0-100); higher score = better cognitive functioning

<sup>b</sup> Significant depressive symptoms are indicated with a score ≥ 6 on the Geriatric Depression Scale

<sup>c</sup> Sleep disturbance is indicated with a score >5 on the Pittsburgh Sleep Quality Index (PSQI)

<sup>d</sup> Physical activity was measured with Physical Activity Scale for the Elderly (PASE) score; higher score = more physically active

\*p≤.05

**Supplemental Table 3.** Relationship between personality measures and higher Pittsburgh Fatigability Scale Mental scores (Final Model): MrOS (N=1,670)

| <b>Variables</b>                 | <b>β Coefficient (SE)</b> | <b>P-value</b> |
|----------------------------------|---------------------------|----------------|
| Conscientiousness                | -0.91 (0.20)              | <0.0001        |
| Optimism                         | -0.63 (0.21)              | 0.003          |
| Goal Reengagement                | 0.51 (0.20)               | 0.01           |
| Goal Disengagement               | -0.15 (0.19)              | 0.42           |
| Age                              | 0.17 (0.05)               | 0.0004         |
| Cognitive Function <sup>a</sup>  | -0.06 (0.03)              | 0.04           |
| Good/Excellent Health Status     | -2.17 (0.65)              | 0.0009         |
| Depressive Symptoms <sup>b</sup> | 4.65 (0.85)               | <0.0001        |
| Sleep Disturbance <sup>c</sup>   | 1.98 (0.39)               | <0.0001        |
| Physical Activity <sup>d</sup>   | -0.02 (0.00)              | <0.0001        |

*Note.* SE=Standard Error; Final model only contains covariates statistically significant at  $p \leq .05$

<sup>a</sup> Cognitive function was measured with Teng Mini Mental Scale (0-100); higher score = better cognitive functioning

<sup>b</sup> Significant depressive symptoms are indicated with a score  $\geq 6$  on the Geriatric Depression Scale

<sup>c</sup> Sleep disturbance is indicated with a score  $>5$  on the Pittsburgh Sleep Quality Index (PSQI)

<sup>d</sup> Physical activity was measured with Physical Activity Scale for the Elderly (PASE) score; higher score = more physically active

**Supplemental Table 4.** Linear regression model examining the association between conscientiousness and Pittsburgh Fatigability Scale Mental scores: MrOS (N=1670)

| <b>Characteristics</b>                      | <b>Model 1</b><br>β coefficient<br>(SE) | <b>Model 2</b><br>β coefficient<br>(SE) | <b>Model 3</b><br>β coefficient<br>(SE) | <b>Model 4</b><br>β coefficient<br>(SE) | <b>Model 5</b><br>β coefficient<br>(SE) |
|---------------------------------------------|-----------------------------------------|-----------------------------------------|-----------------------------------------|-----------------------------------------|-----------------------------------------|
| <b>Personality Measure</b>                  |                                         |                                         |                                         |                                         |                                         |
| Conscientiousness                           | -1.49 (0.20)*                           | -1.50 (0.20)*                           | -0.98 (0.20)*                           | -0.97 (0.20)*                           | -0.90 (0.20)*                           |
| Optimism                                    |                                         |                                         |                                         |                                         | -0.70 (0.22)*                           |
| Goal Reengagement                           |                                         |                                         |                                         |                                         | 0.50 (0.20)*                            |
| Goal Disengagement                          |                                         |                                         |                                         |                                         | -0.12 (0.19)                            |
| <b>Demographics</b>                         |                                         |                                         |                                         |                                         |                                         |
| Age                                         | 0.28 (0.05)*                            | 0.29 (0.05)*                            | 0.18 (0.05)*                            | 0.19(0.05)*                             | 0.18 (0.05)*                            |
| Race (ref=White)                            |                                         |                                         |                                         |                                         |                                         |
| Black                                       |                                         | 0.22 (1.23)                             | 0.03 (1.18)                             | 0.01 (1.18)                             | -0.23 (1.18)                            |
| Asian                                       |                                         | -0.87 (1.13)                            | -1.18 (1.08)                            | -1.18 (1.09)                            | -1.45 (1.09)                            |
| Hispanic                                    |                                         | 1.31 (1.34)                             | 1.11 (1.28)                             | 1.11 (1.28)                             | 1.10 (1.28)                             |
| Other                                       |                                         | 1.78 (1.70)                             | 1.28 (1.62)                             | 1.18 (1.62)                             | 1.28 (1.62)                             |
| Education (ref= ≤high school)               |                                         |                                         |                                         |                                         |                                         |
| Some/all college                            |                                         | 0.41 (0.57)                             | 0.56 (0.54)                             | 0.58 (0.55)                             | 0.68 (0.55)                             |
| Some/all graduate school                    |                                         | 0.30 (0.56)                             | 0.55 (0.54)                             | 0.55 (0.55)                             | 0.66 (0.57)                             |
| <b>Psychological and Behavioral Factors</b> |                                         |                                         |                                         |                                         |                                         |
| Cognitive Function <sup>a</sup>             |                                         |                                         | -0.07 (0.03)*                           | -0.06 (0.03)*                           | -0.06 (0.03)*                           |
| Good/Excellent Health Status                |                                         |                                         | -2.32 (0.65)*                           | -2.18 (0.66)*                           | -2.03 (0.66)*                           |
| Depressive Symptoms <sup>b</sup>            |                                         |                                         | 4.96 (0.84)*                            | 5.04 (0.84)*                            | 4.66 (0.86)*                            |
| Sleep Disturbance <sup>c</sup>              |                                         |                                         | 2.09 (0.39)*                            | 2.06 (0.39)*                            | 1.95 (0.39)*                            |
| Physical Activity <sup>d</sup>              |                                         |                                         | -0.02 (0.00)*                           | -0.02 (0.00)*                           | -0.02 (0.00)*                           |

---

**Health-related Conditions**

|                                    |              |              |
|------------------------------------|--------------|--------------|
| Hypertension                       | 0.15 (0.39)  | 0.18 (0.39)  |
| Heart Failure                      | 0.53 (0.70)  | 0.44 (0.70)  |
| Stroke                             | 0.54 (0.89)  | 0.56 (0.88)  |
| Heart Attack                       | -0.51 (0.58) | -0.49 (0.57) |
| Diabetes                           | 0.71 (0.54)  | 0.79 (0.54)  |
| Body Mass Index, kg/m <sup>2</sup> | 0.02 (0.05)  | 0.01 (0.05)  |

---

*Note.* All covariates stayed in the model at the addition of a new set of variables regardless of significance

SE=Standard Error

<sup>a</sup> Cognitive function was measured with Teng Mini Mental Scale (0-100); higher score = better cognitive functioning

<sup>b</sup> Significant depressive symptoms are indicated with a score  $\geq 6$  on the Geriatric Depression Scale

<sup>c</sup> Sleep disturbance is indicated with a score  $>5$  on the Pittsburgh Sleep Quality Index (PSQI)

<sup>d</sup> Physical activity was measured with Physical Activity Scale for the Elderly (PASE) score; higher score = more physically active

\* $p \leq .05$
